# Supplementary material for: Assessment of the cytotoxicity micro- and nano-plastic on human intestinal Caco-2 cells and the protective effects of catechin
Source: Royal Society of Chemistry journal article supplement (doi:10.1039/d4em00408f), 2024-01-01
Supplement: d4em00408f1.pdf [file d4em00408f1.pdf]

## Supplementary Information

### Assessment of the Cytotoxicity Micro- and Nano-Plastic on Human Intestinal Caco-2 Cells and the Protective Effects of Catechin

Xiaoxia Wang<sup>a,b</sup>, Zhongneng Yang<sup>a</sup>, Xiao-Min Ren<sup>a,\*</sup>, Zhenghuan Zhang<sup>a</sup>, Huan  
He<sup>a</sup>, Xuejun Pan<sup>a,\*</sup>

<sup>a</sup> Faculty of Environmental Science and Engineering, Kunming University of Science  
and Technology, Kunming 650093, China

<sup>b</sup> College of Resources and Environmental Engineering, Tianshui Normal University,  
Tianshui 741000, China

#### Corresponding Authors:

\* Xiao-Min Ren, Faculty of Environmental Science and Engineering, Kunming  
University of Science and Technology, 727 South Jingming Road, Chenggong District,  
Kunming 650093, China. E-mail: [412656694@qq.com](mailto:412656694@qq.com)

\* Xuejun Pan, Faculty of Environmental Science and Engineering, Kunming University  
of Science and Technology, 727 South Jingming Road, Chenggong District, Kunming  
650093, China. E-mail: [xjpan@kust.edu.cn](mailto:xjpan@kust.edu.cn)

**Number of pages: 9**

**Contents:**

**Figure S1.** The morphology of PS plastic particles used in this study.

**Figure S2.** The composition of PS plastic particles used in this study.

**Figure S3.** The particle sizes distributions of the four types of PS plastic particles in culture medium.

**Figure S4.** Scavenging effect of different concentrations of N-acetyl-L-cysteine (NAC) on ROS induced by 20 nm polystyrene nano-plastics.

**Figure S5.** The protective effects of the four catechins against cytotoxicity induced by 20 nm polystyrene nano-plastics at a concentration of 20 mg/mL.

**Text S1.** Details of the hazard quotient (HQ) calculation.

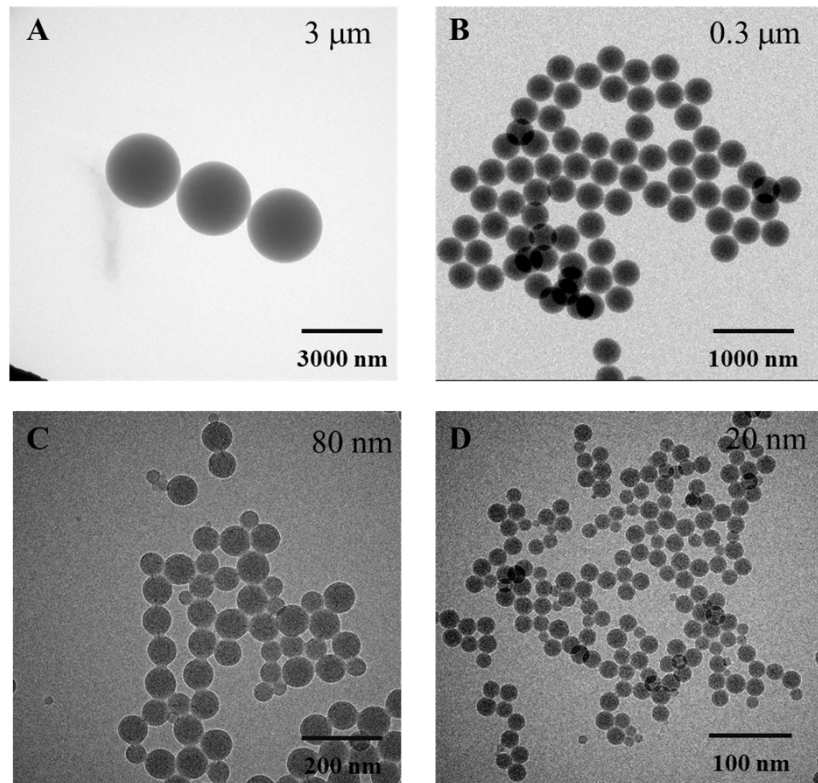

**Figure S1.** The morphology of PS plastic particles used in this study. (A) TEM image of 3  $\mu\text{m}$  PS-NP in culture medium; (B) TEM image of 0.3  $\mu\text{m}$  PS-NP in culture medium, (C) TEM image of 80 nm PS-NP in culture medium, (D) TEM image of 20 nm PS-NP in culture medium.

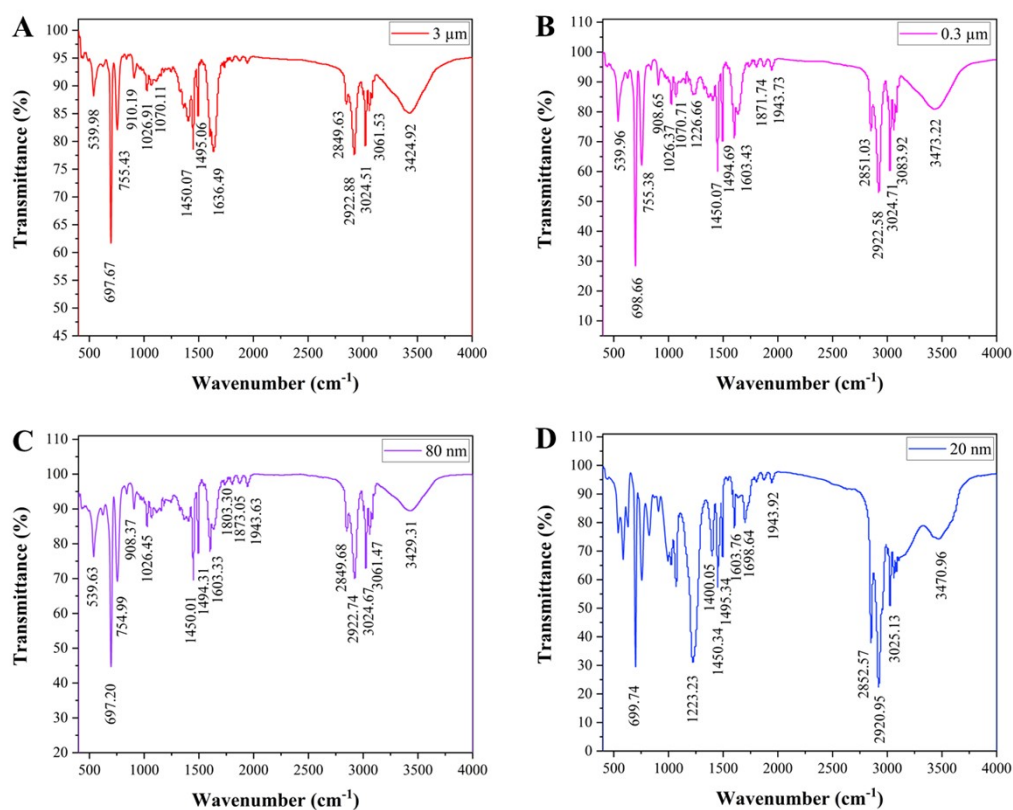

**Figure S2.** The composition of PS plastic particles used in this study. (A) FTIR spectrographs for the 3  $\mu\text{m}$  PS plastic particles, (B) FTIR spectrographs for the 0.3  $\mu\text{m}$  PS plastic particles, (C) FTIR spectrographs for the 80 nm PS plastic particles, (D) FTIR spectrographs for the 20 nm PS plastic particles.

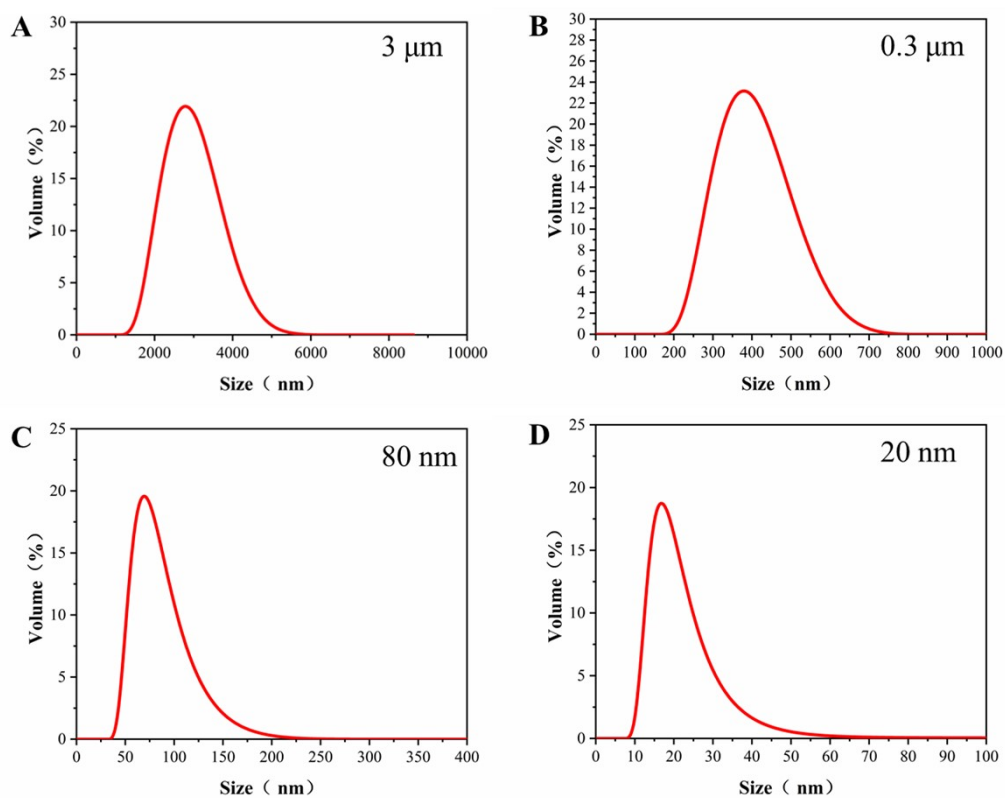

**Figure S3.** The particle sizes distributions of the four types of PS plastic particles in culture medium. (A) The particle sizes distribution for 3  $\mu\text{m}$  PS-MP; (B) The particle sizes distribution for 0.3  $\mu\text{m}$  PS-MP, (C) The particle sizes distribution for 80 nm PS-NP; (D) The particle sizes distribution for 20 nm PS-NP.

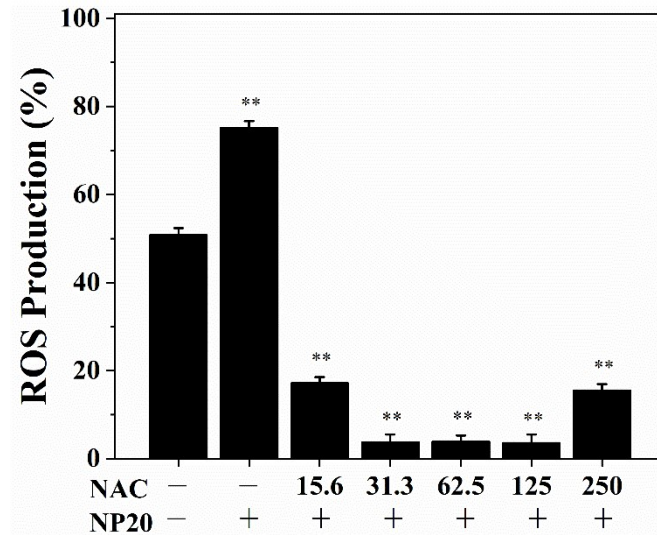

**Figure S4.** Scavenging effect of different concentrations of N-acetyl-L-cysteine (NAC) on ROS induced by 20 nm polystyrene nano-plastics. The results presented are the means  $\pm$  SD from three independent experiments. \* means  $p < 0.05$  (\*\* means  $p < 0.01$ ), compared with the negative control group.

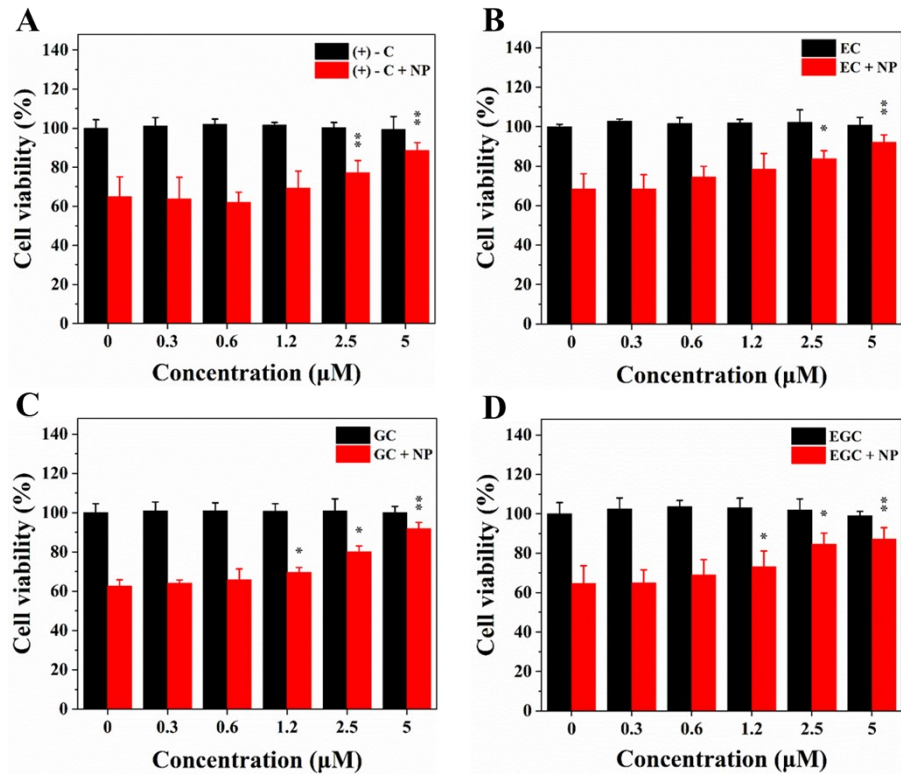

**Figure S5.** The protective effects of the four catechins against cytotoxicity induced by 20 nm polystyrene nano-plastics at a concentration of 20 mg/mL. The results presented are the means  $\pm$  SD from three independent experiments. \* means  $p < 0.05$  (\*\* means  $p < 0.01$ ), compared with the negative control group.

**Text S1. Hazard quotient (HQ).**

The hazard quotients (HQ) were calculated as follows <sup>1-2</sup>:

$$\text{HQ} = \text{Measured serum level} \times \text{Uncertainty factor (UF)} / \text{PoD}$$

PoD is the lowest observed adverse effect level (LOAEL) (3  $\mu\text{m}$ : 0.01  $\mu\text{g/mL}$ ,  $\sim 674$  items/mL; 0.3  $\mu\text{m}$ : 0.01  $\mu\text{g/mL}$ ,  $\sim 674,000$  items/mL; 80 nm:  $\sim 35.5$  million items/mL; 20 nm:  $\sim 2.27$  billion items/mL). The generally accepted default UF = 300 (3  $\times$  for inter-species interpolation, 10  $\times$  for human variability, and 10  $\times$  for LOAEL to NOAEL extrapolation), and that was used. An HQ below 1 indicates an absence of risk for the particular endpoint considered, whereas HQ greater than 1 indicates exposure that may be regarded as being of concern.



## **REFERENCES:**

1. Stoner, K. A.; Eitzer, B. D., Correction: Using a Hazard Quotient to Evaluate Pesticide Residues Detected in Pollen Trapped from Honey Bees (*Apis mellifera*) in Connecticut. *PLoS One* **2016**, *11* (7), e0159696.
2. Ludwicki, J. K.; Goralczyk, K.; Strucinski, P., et al., Hazard quotient profiles used as a risk assessment tool for PFOS and PFOA serum levels in three distinctive European populations. *Environ. Int.* **2015**, *74*, 112-8.
